# Supplementary material for: ScRNA-seq Unveils the Functional Characteristics of Glioma-Associated Macrophages and the Regulatory Effects of Chlorogenic Acid on the Immune Microenvironment—A Study Based on Mouse Models and Clinical Practice
Source: Preprints.org preprint supplement (doi:10.20944/preprints202408.0392.v1), 2024-08-06
Supplement: Supplementary file 1 [file supplementary]

## Sheet: Sheet1
scores	genes
MOMF score	'Ifitm2','S100a6','S100a11','Lgals3','Lsg15','Ms4a4c','Crip1'
MG score	'Tmem119','P2ry12','Cx3cr1','Olfm3','Sparc','Gpr34'
tumor supportive	Il10, "Arg1", "Mmp12", "Mmp14", "Timp2", "Vegfa", "Vegfb", "Trem2", "Apoe"
IFN score	'Ifi211', 'Ifi208', 'Ifitm1', 'Irf2bp2', 'Ifnar2', 'Ifit1bl1', 'Ifih1', 'Ifi214', 'Ifitm3', 'Ifng', 'Irf2bpl', 'Ifi44', 'Ifi204', 'Irf7', 'Ifitm6', 'Ifit1', 'Isg15', 'Ifi207', 'Irf5', 'Ifitm2', 'Ifit2', 'Ifi206', 'Ifi213', 'Irf2', 'Ifi35', 'Ifit3b', 'Ifi203', 'Irf9', 'Isg20', 'Irf1', 'Ifi27', 'Ifi209', 'Irf3', 'Irf8', 'Irf4', 'Ifit3', 'Isg20l2', 'Ifngr1', 'Irf2bp1', 'Ifngr2', 'Ifi47', 'Ifi205', '…
Activation score	‘Cd74','H2-Aa','H2-Ab1','Stat1','Ccl12','C4b','Lglas3bp','Bst2','B2m','Cd52','Ifitm3'
Cytokine score	Tnf, "Ccl2", "Ccl3", "Ccl4", "Il1a", "Il1b"
Phagocytosis score	Apoe, "Lgals3", "Fabp5", "Gpnmb", "Spp1",'Ctss','Cstb','Ctsd'
transciption score	"Klf2", "Egr1", "Cited2", "Klf4", "Fos", "Atf3", "Fosb", "Ier2","Jun", "Junb", "Jund"
proliferation	"Stmn1", "Top2a", "Birc5", "Tubb5", "Tubb4b", "Tuba1b", "Ube2c","Hmgb2", "Pclaf", "Ccnb1", "Ccnb2", "Ccna2","Cks1b", "Cdk1"
MHC-II	H2-Aa','H2-Ab1','H2-D1','H2-K1','H2-Eb1'

## Sheet: Sheet2
gene	target group
Selplg	adult-microglia
Cd19	B-cells
Ms4a1	B-cells
Sdc1	B-cells
Ccr2	classical monocytes
Cd24a	DCs
Cd83	DCs
Cst3	DCs
Ptprc	hematopoietic cells
Ccl5	M1
Cxcl10	M1
Cxcl19	M1
Il1b	M1
Stat1	M1
Apoe	M2(TAMs)
Arg1	M2(TAMs)
Cd274	M2(TAMs)
Gpnmb	M2(TAMs)
Sell	M2(TAMs)
Trem2	M2(TAMs)
Ifitm2	macrophages
Ifitm3	macrophages
Itga4	macrophages
Lgal3bp	macrophages
S100a11	macrophages
S100a6	macrophages
Tgfbi	macrophages
Gpr34	microglia
P2ry12	microglia
Tmem119	microglia
Ly6c2	monocytes
Plac8	monocytes
Itgam	myeloid cells
Cd14	myelomonocytic cells
Klrb1c	NK-cells
Klrk1	NK-cells
Ncam1	NK-cells
Ncr1	NK-cells
Crybb1	pre-microglia
Cd3d	T-cells
Cd3e	T-cells
Cd3g	T-cells
Cd4	T-cells
Cd8a	T-cells
Cd8b1	T-cells
Cd2	T-cells,NK-cells

## Sheet: Sheet3
Single-cell RNA sequencing (scRNA-seq)
Sample ID	Total number of called cellsb	Median number (and range) of uniquely mapped reads per called cellb	Median rRNA rate (and range) per called cellb	Median number (and range) of detected genes per called cellb
CHA1	6336	3309(666~13824)	13.51396(0.2431118-13.51396)	1360(500-2999)
CHA2	3576	2230.5(695~14899)	11.21295(0.3568243-29.77778)	1032(500-2991)
CHA3	4953	2741(657~15906)	12.06827(0.3015454-30.30069)	1201(500-2998)
CON1	5164	2869.5(685~16482)	13.10084(0.1935484-23.96931)	1222.5(500-2999)
CON2	2344	4448.5(652~16565)	12.00712(0.1858736-25.71293)	1787(501-2994)
CON3	2961	3167(644~16727)	12.39368(0.308404-31.98223)	1373(501-2999)
