# Supplementary material for: ScRNA-seq Unveils the Functional Characteristics of Glioma-Associated Macrophages and the Regulatory Effects of Chlorogenic Acid on the Immune Microenvironment—A Study Based on Mouse Models and Clinical Practice
Source: Preprints.org preprint supplement (doi:10.20944/preprints202408.0392.v1), 2024-08-06
Supplement: Supplementary file 5 [file supplementary]

| gene    | target group         |
|---------|----------------------|
| Selp1g  | adult-microglia      |
| Cd19    | B-cells              |
| Ms4a1   | B-cells              |
| Sdc1    | B-cells              |
| Ccr2    | classical monocytes  |
| Cd24a   | DCs                  |
| Cd83    | DCs                  |
| Cst3    | DCs                  |
| Ptprc   | hematopoietic cells  |
| Ccl5    | M1                   |
| Cxcl10  | M1                   |
| Cxcl19  | M1                   |
| Il1b    | M1                   |
| Stat1   | M1                   |
| Apoe    | M2(TAMs)             |
| Arg1    | M2(TAMs)             |
| Cd274   | M2(TAMs)             |
| Gpnmb   | M2(TAMs)             |
| Sell    | M2(TAMs)             |
| Trem2   | M2(TAMs)             |
| Ifitm2  | macrophages          |
| Ifitm3  | macrophages          |
| Itga4   | macrophages          |
| Lgal3bp | macrophages          |
| S100a11 | macrophages          |
| S100a6  | macrophages          |
| Tgfb1   | macrophages          |
| Gpr34   | microglia            |
| P2ry12  | microglia            |
| Tmem119 | microglia            |
| Ly6c2   | monocytes            |
| Plac8   | monocytes            |
| Itgam   | myeloid cells        |
| Cd14    | myelomonocytic cells |
| Klrb1c  | NK-cells             |
| Klrk1   | NK-cells             |
| Ncam1   | NK-cells             |
| Ncr1    | NK-cells             |
| Crybb1  | pre-microglia        |
| Cd3d    | T-cells              |
| Cd3e    | T-cells              |
| Cd3g    | T-cells              |
| Cd4     | T-cells              |
| Cd8a    | T-cells              |
| Cd8b1   | T-cells              |
| Cd2     | T-cells,NK-cells     |
