# Supplementary material for: ScRNA-seq Unveils the Functional Characteristics of Glioma-Associated Macrophages and the Regulatory Effects of Chlorogenic Acid on the Immune Microenvironment—A Study Based on Mouse Models and Clinical Practice
Source: Preprints.org preprint supplement (doi:10.20944/preprints202408.0392.v1), 2024-08-06
Supplement: Supplementary file 6 [file supplementary]

| scores              | genes                                                                                                                                                                                                                                                                                                                                                                                                                                                   |
|---------------------|---------------------------------------------------------------------------------------------------------------------------------------------------------------------------------------------------------------------------------------------------------------------------------------------------------------------------------------------------------------------------------------------------------------------------------------------------------|
| MOMF score          | 'Ifitm2','S100a6','S100a11','Lgals3','Lsg15','Ms4a4c','Crip1'                                                                                                                                                                                                                                                                                                                                                                                           |
| MG score            | 'Tmem119','P2ry12','Cx3cr1','Olfm3','Sparc','Gpr34'                                                                                                                                                                                                                                                                                                                                                                                                     |
| tumor supportive    | Il10, "Arg1", "Mmp12", "Mmp14", "Timp2", "Vegfa", "Vegfb", "Trem2", "ApoE"                                                                                                                                                                                                                                                                                                                                                                              |
| IFN score           | 'Ifi211', 'Ifi208', 'Ifitm1', 'Irf2bp2', 'Ifnar2', 'Ifit1bl1', 'Ifih1', 'Ifi214', 'Ifitm3', 'Ifng', 'Irf2bpl', 'Ifi44', 'Ifi204', 'Irf7', 'Ifitm6', 'Ifit1', 'lsg15', 'Ifi207', 'Irf5', 'Ifitm2', 'Ifit2', 'Ifi206', 'Ifi213', 'Irf2', 'Ifi35', 'Ifit3b', 'Ifi203', 'Irf9', 'lsg20', 'Irf1', 'Ifi27', 'Ifi209', 'Irf3', 'Irf8', 'Irf4', 'Ifit3', 'lsg20l2', 'Ifngr1', 'Irf2bp1', 'Ifngr2', 'Ifi47', 'Ifi205', 'Ifitm5', 'Ifitm10', 'Ifnar1', 'Ifi27l2a' |
| Activation score    | 'Cd74','H2-Aa','H2-Ab1','Stat1','Ccl12','C4b','Lglas3bp','Bst2','B2m','Cd52','Ifitm3'                                                                                                                                                                                                                                                                                                                                                                   |
| Cytokine score      | Tnf, "Ccl2", "Ccl3", "Ccl4", "Il1a", "Il1b"                                                                                                                                                                                                                                                                                                                                                                                                             |
| Phagocytosis score  | ApoE, "Lgals3", "Fabp5", "Gpnmb", "Spp1", 'Ctss', 'Cstb', 'Ctsd'                                                                                                                                                                                                                                                                                                                                                                                        |
| transcription score | "Klf2", "Egr1", "Cited2", "Klf4", "Fos", "Atf3", "Fosb", "Ier2", "Jun", "Junb", "Jund"                                                                                                                                                                                                                                                                                                                                                                  |
| proliferation       | "Stmn1", "Top2a", "Birc5", "Tubb5", "Tubb4b", "Tuba1b", "Ube2c", "Hmgb2", "Pclaf", "Ccnb1", "Ccnb2", "Ccna2", "Cks1b", "Cdk1"                                                                                                                                                                                                                                                                                                                           |
| MHC-II              | H2-Aa', 'H2-Ab1', 'H2-D1', 'H2-K1', 'H2-Eb1'                                                                                                                                                                                                                                                                                                                                                                                                            |
