# Supplementary material for: ScRNA-seq Unveils the Functional Characteristics of Glioma-Associated Macrophages and the Regulatory Effects of Chlorogenic Acid on the Immune Microenvironment—A Study Based on Mouse Models and Clinical Practice
Source: Preprints.org preprint supplement (doi:10.20944/preprints202408.0392.v1), 2024-08-06
Supplement: Supplementary file 7 [file supplementary]

| <b>MCC</b> | <b>DMNC</b> | <b>MNC</b> | <b>Degree</b> | <b>EPC</b> | <b>BottleNeck</b> | <b>EcCentricity</b> | <b>Closeness</b> | <b>Radiality</b> | <b>Betweenness</b> | <b>Stress</b> |
|------------|-------------|------------|---------------|------------|-------------------|---------------------|------------------|------------------|--------------------|---------------|
| SRC        | PDGFRB      | SRC        | SRC           | SRC        | SRC               | SRC                 | SRC              | SRC              | SRC                | SRC           |
| PRKCD      | CASP3       | PRKCD      | PIK3R1        | PIK3R1     | PIK3R1            | PIK3R1              | PIK3R1           | PIK3R1           | PIK3R1             | PRKCD         |
| PIK3R1     | STAT1       | PIK3R1     | PRKCD         | PRKCD      | PRKCD             | PRKCD               | PRKCD            | PRKCD            | PRKCD              | PIK3R1        |
| MAPK1      | PRKCA       | MAPK1      | MAPK1         | STAT1      | MAPK8             | MAPK8               | MAPK1            | MAPK1            | CASP3              | CASP3         |
| CASP3      | PDGFRA      | ITGB2      | CASP3         | MAPK1      | ITGB2             | STAT1               | MAPK8            | MAPK8            | TLR4               | MAPK1         |
| ITGB2      | PRKCD       | CASP3      | ITGB2         | MAPK8      | CASP3             | ITGB2               | TLR4             | STAT1            | MAPK1              | ITGB2         |
| STAT1      | NFKB1       | STAT1      | NFKB1         | CASP3      | TLR4              | CASP3               | STAT1            | TLR4             | ITGB2              | TLR4          |
| PRKCA      | MMP9        | PRKCA      | TLR4          | PDGFRA     | PRKCA             | TLR4                | ITGB2            | ITGB2            | MMP2               | MAPK8         |
| PDGFRA     | MMP2        | PDGFRA     | STAT1         | NFKB1      | IKBKB             | PRKCA               | NFKB1            | NFKB1            | NFKB1              | NFKB1         |
| NFKB1      | IGF1R       | MAPK8      | PRKCA         | ITGB2      | MAPK1             | IKBKB               | CASP3            | IKBKB            | PRKCA              | MMP2          |
| MAPK8      | ICAM1       | NFKB1      | MAPK8         | TLR4       | NFKB1             | MAPK1               | IKBKB            | MMP9             | IGF1R              | PRKCA         |
| PDGFRB     | IKBKB       | PDGFRB     | PDGFRA        | PDGFRB     | MMP9              | NFKB1               | MMP9             | IGF1R            | MAPK8              | IGF1R         |
| TLR4       | MAP2K2      | MMP9       | MMP9          | PRKCA      | IGF1R             | MMP9                | IGF1R            | PDGFRA           | MMP9               | MMP9          |
| MMP9       | PTK2B       | MMP2       | MMP2          | IKBKB      | MMP2              | IGF1R               | PDGFRA           | CASP3            | CASP8              | IKBKB         |
| MMP2       | ITGAL       | IGF1R      | IGF1R         | MMP9       | CASP8             | MMP2                | MMP2             | MMP2             | IKBKB              | STAT1         |
| IGF1R      | TLR4        | ICAM1      | ICAM1         | IGF1R      | CHUK              | CHUK                | PRKCA            | PDGFRB           | ICAM1              | CASP8         |
| ICAM1      | CASP8       | IKBKB      | IKBKB         | MAP2K2     | STAT1             | PDGFRA              | PDGFRB           | PIK3CG           | STAT1              | ICAM1         |
| IKBKB      | CHUK        | MAP2K2     | CASP8         | ICAM1      | PDGFRA            | PDGFRB              | PTK2B            | PTK2B            | CASP1              | PTK2B         |
| MAP2K2     | PIK3CG      | PTK2B      | PDGFRB        | PTK2B      | PDGFRB            | MAP2K2              | PIK3CG           | PRKCA            | CHUK               | CHUK          |
| PTK2B      | MMP1        | ITGAL      | MAP2K2        | MMP2       | MAP2K2            | PTK2B               | ICAM1            | ICAM1            | PTK2B              | CASP1         |
