# Supplementary figures and images for: ScRNA-seq Unveils the Functional Characteristics of Glioma-Associated Macrophages and the Regulatory Effects of Chlorogenic Acid on the Immune Microenvironment—A Study Based on Mouse Models and Clinical Practice
Source: Preprints.org preprint supplement (doi:10.20944/preprints202408.0392.v1), 2024-08-06

**nFeature\_RNA**

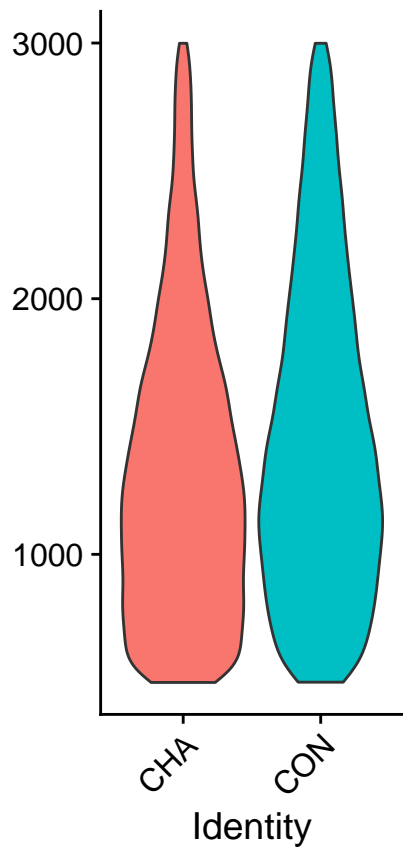

**nCount\_RNA**

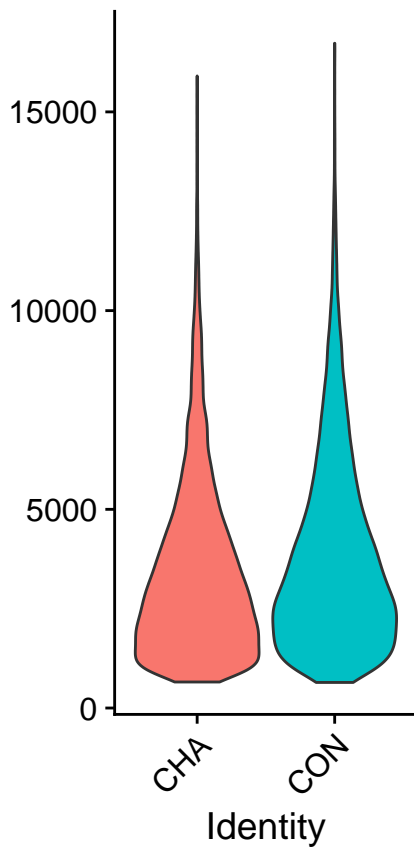

**percent.mito**

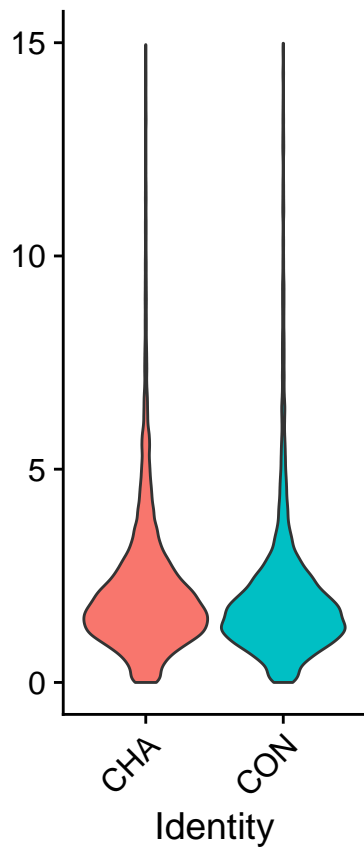

Supplement: Supplementary file 2 [file supplementary]

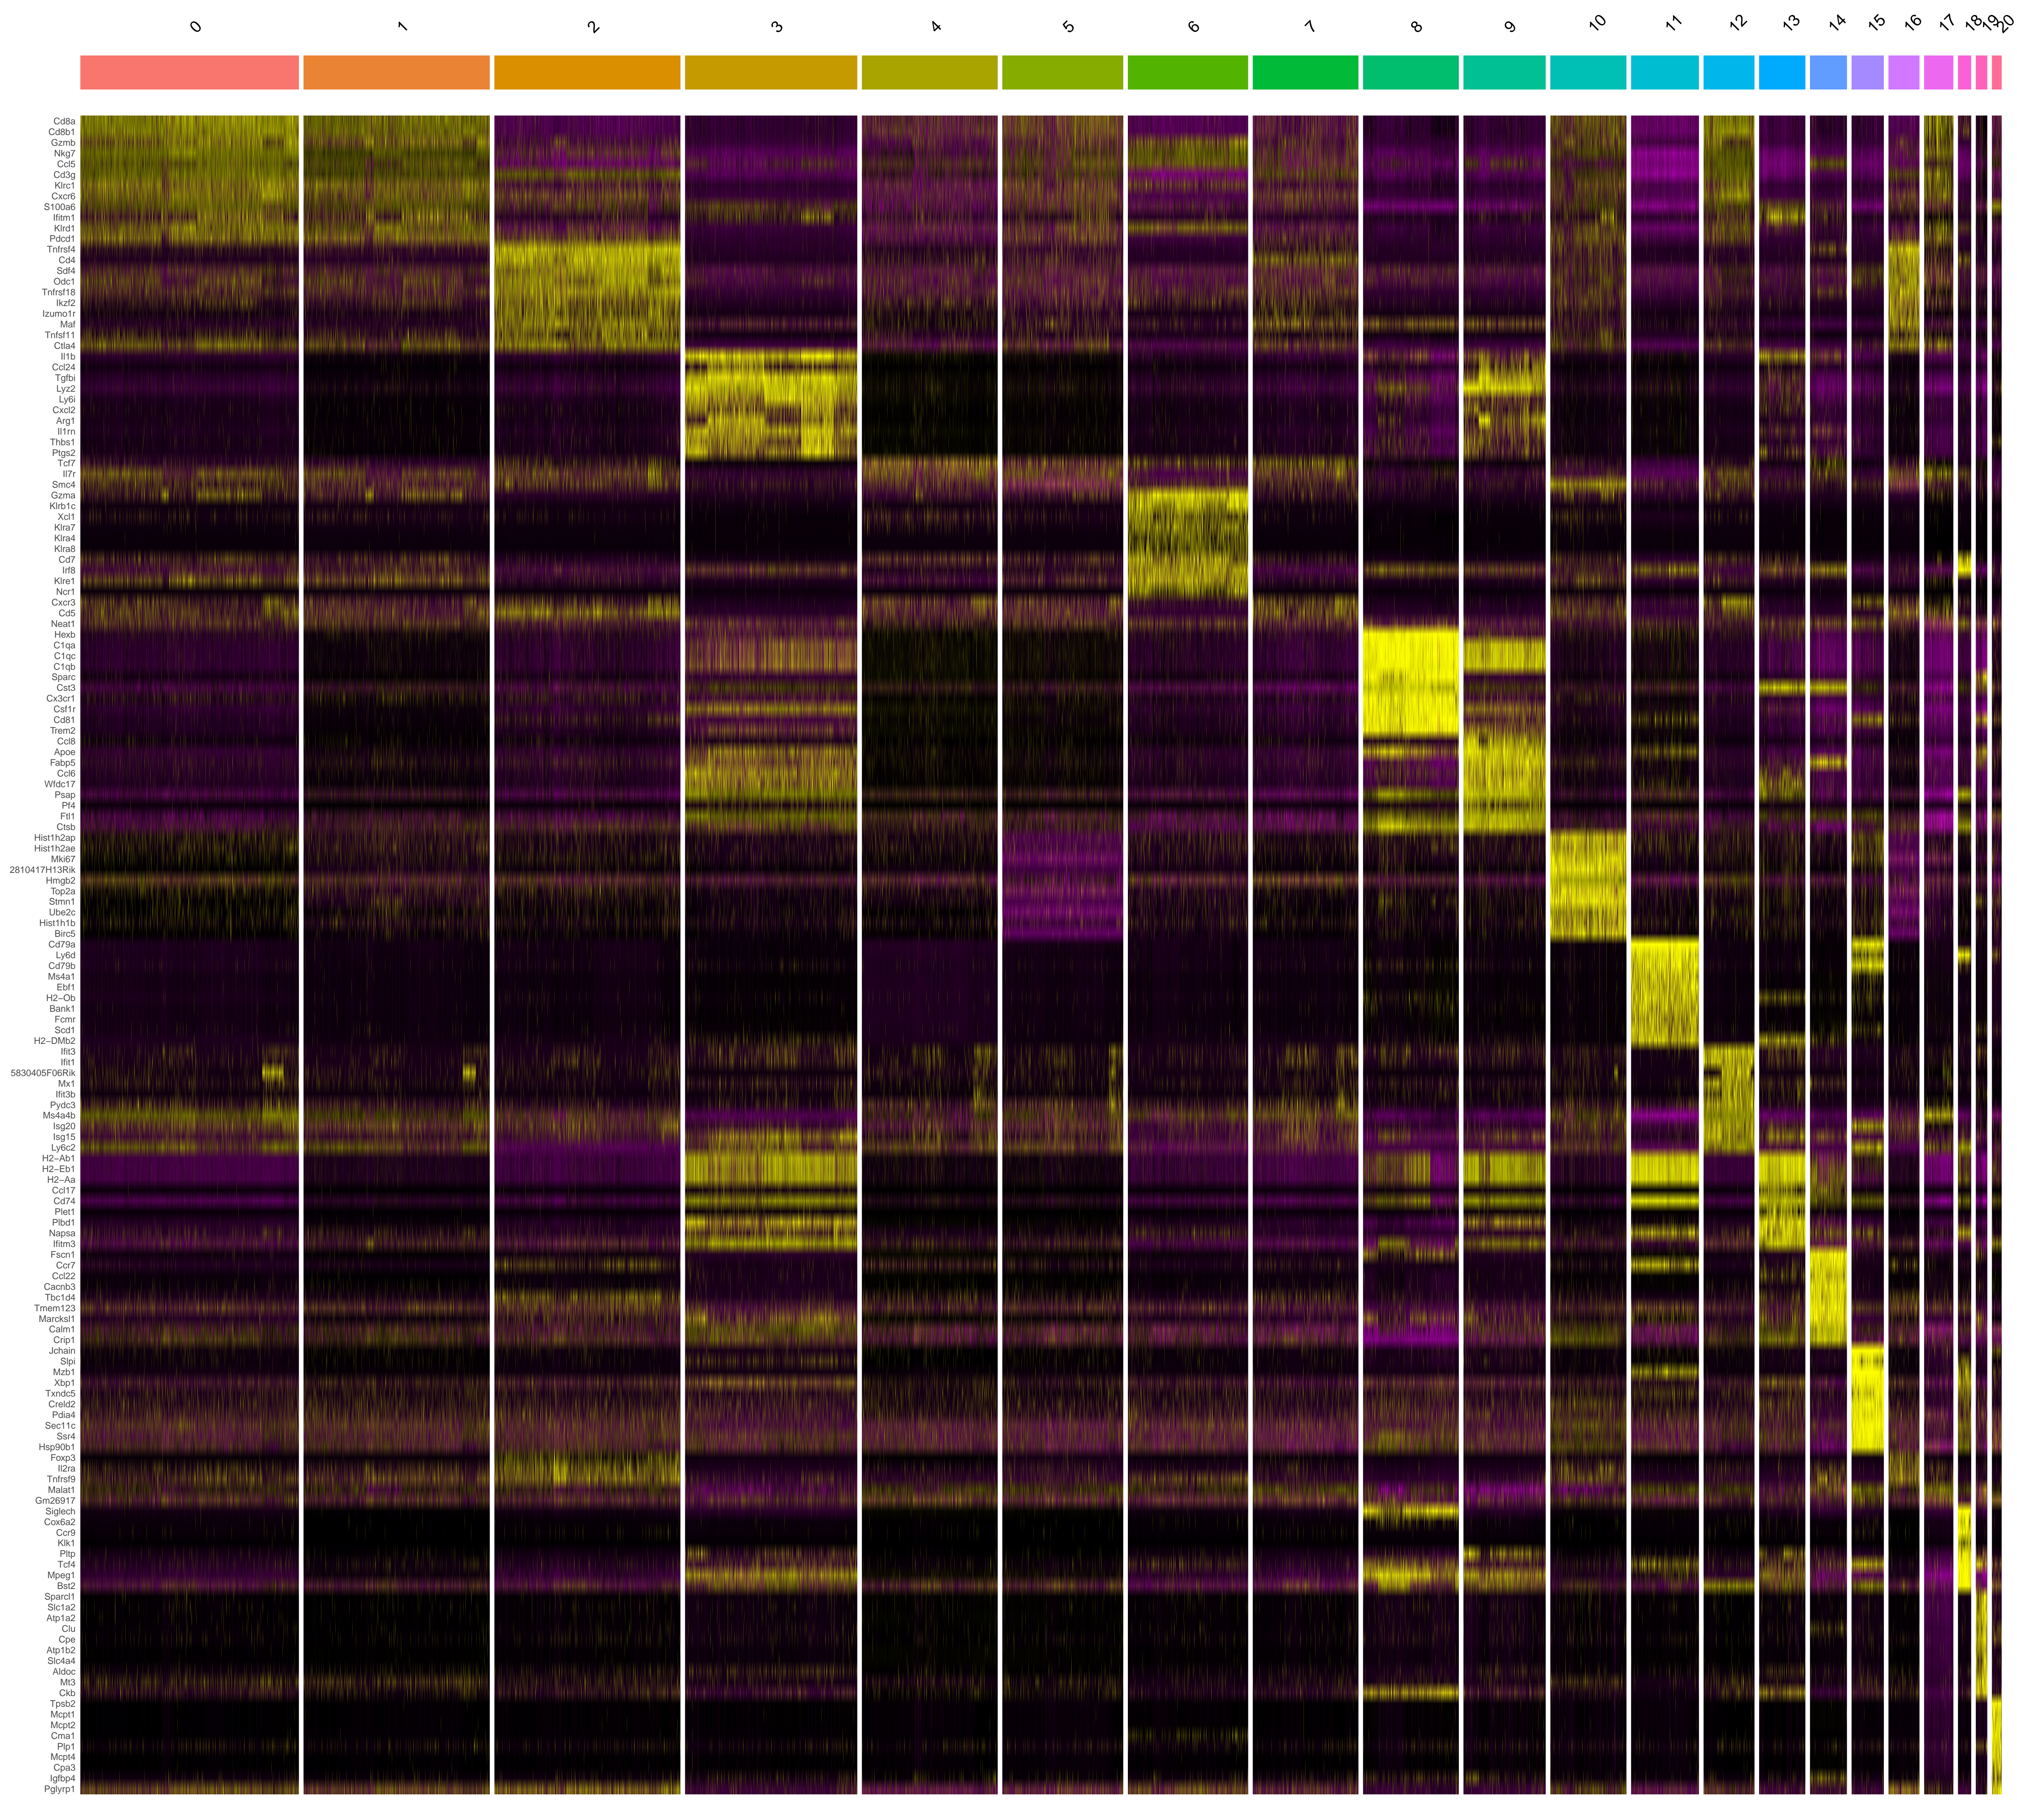

Supplement: Supplementary file 8 [file supplementary]

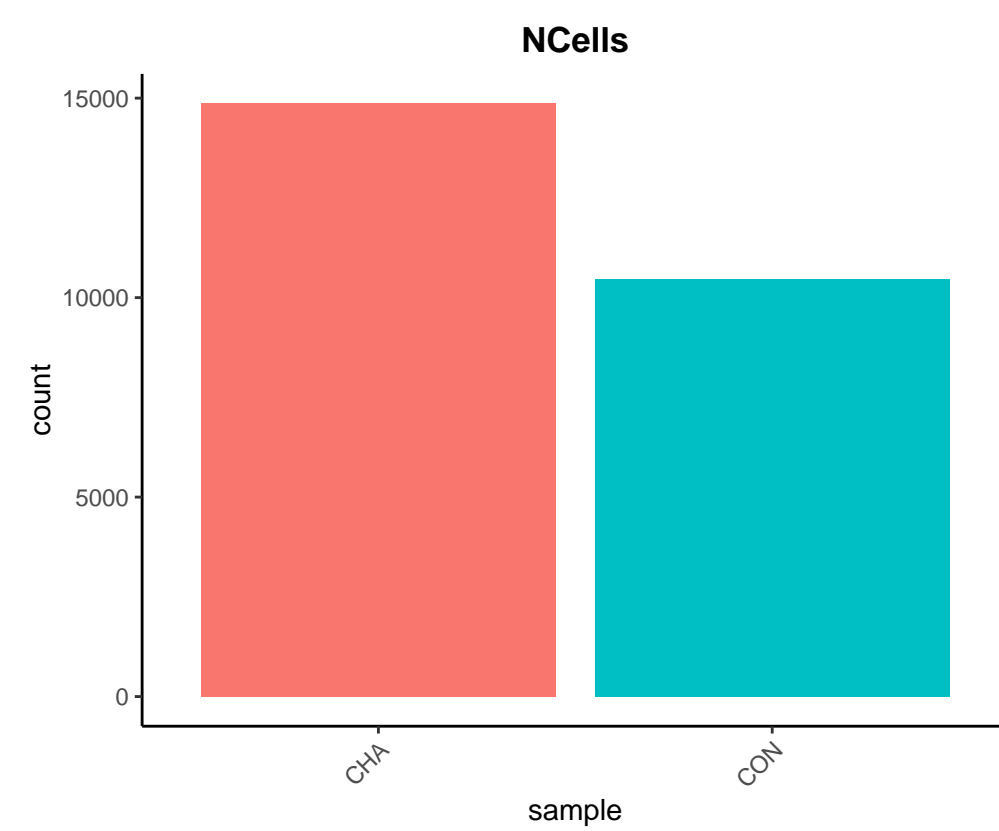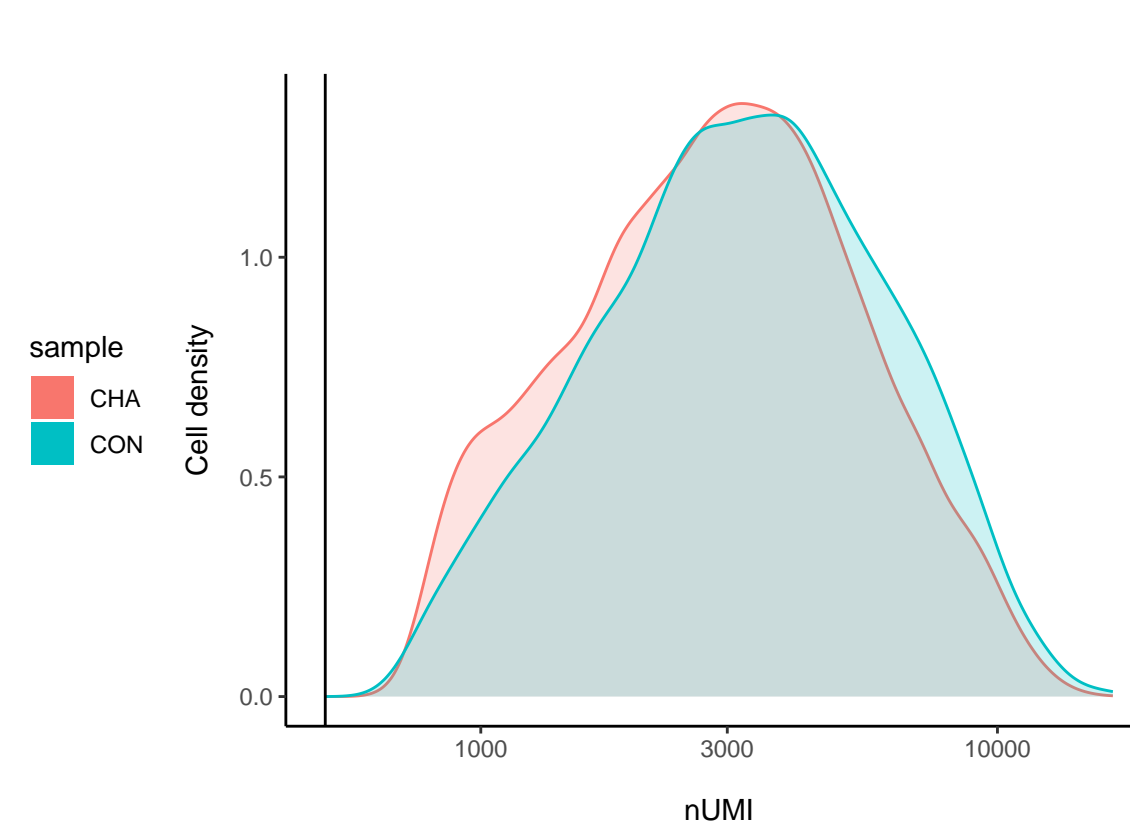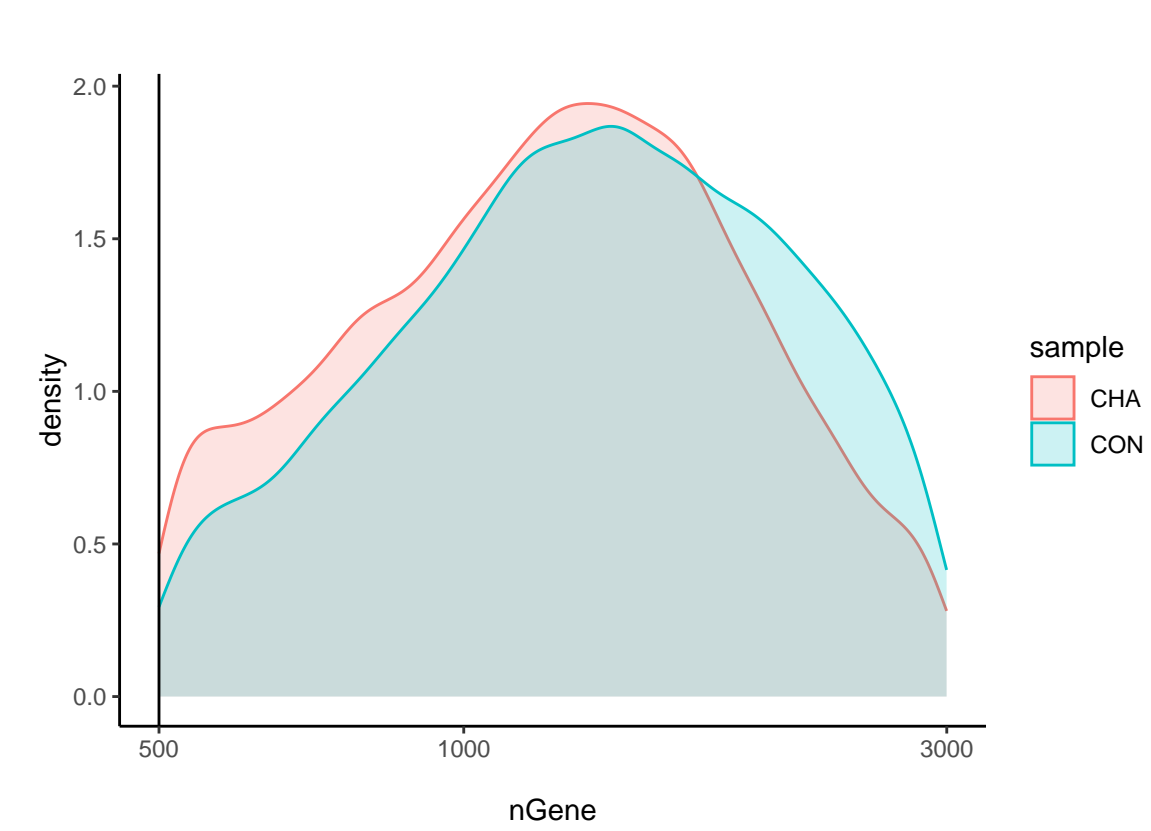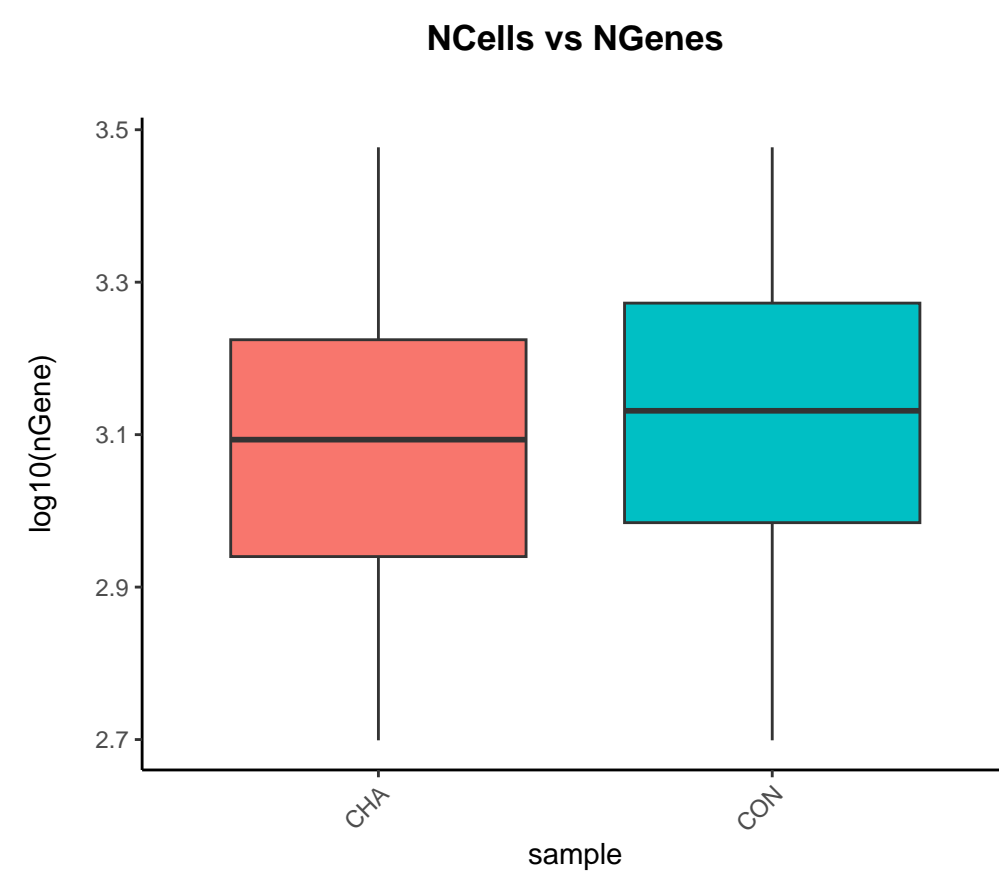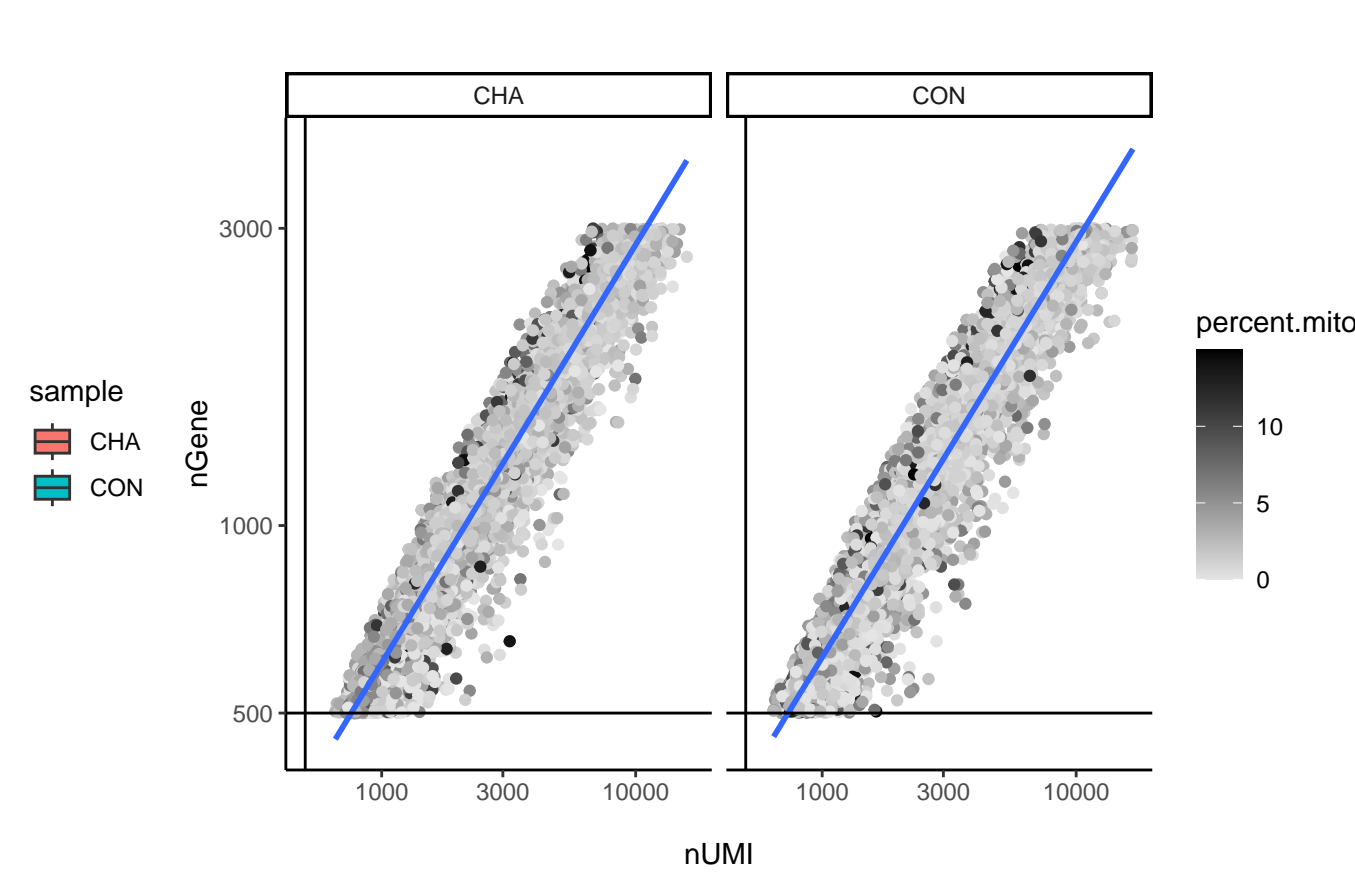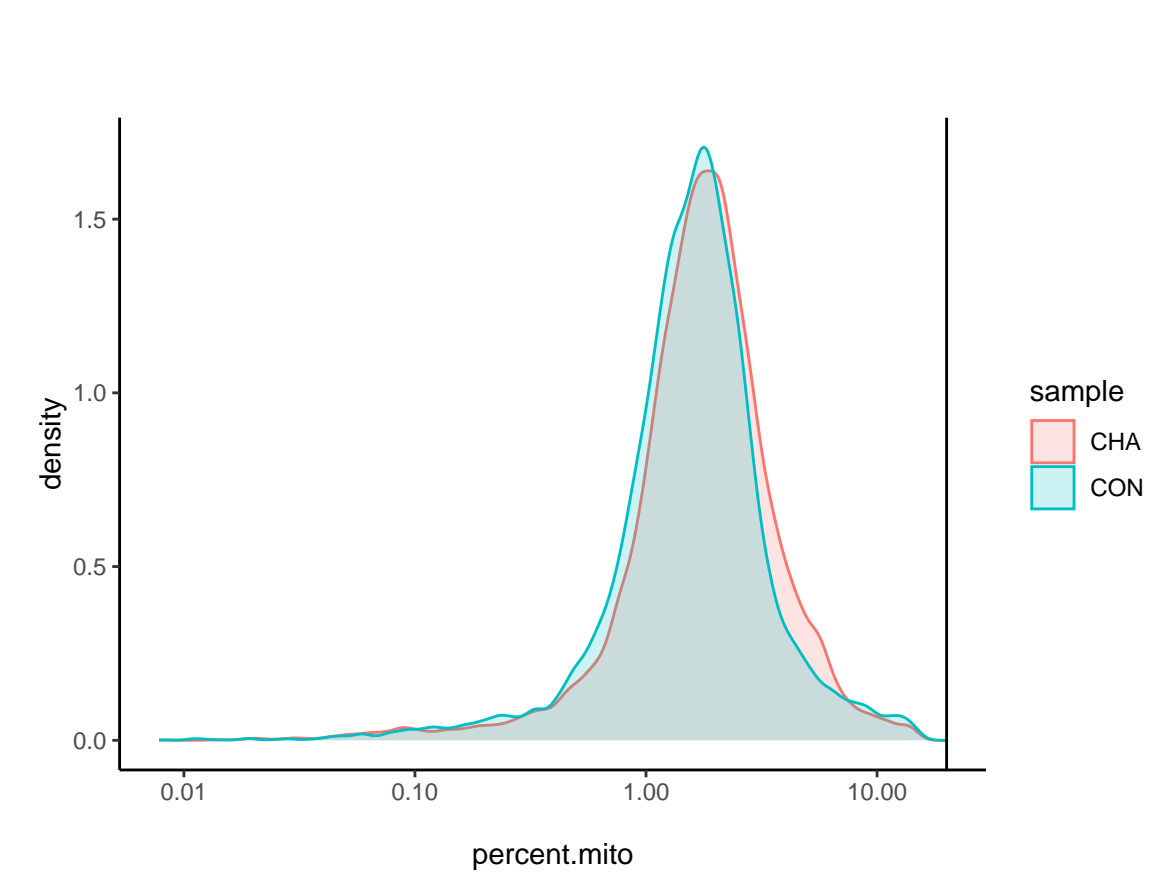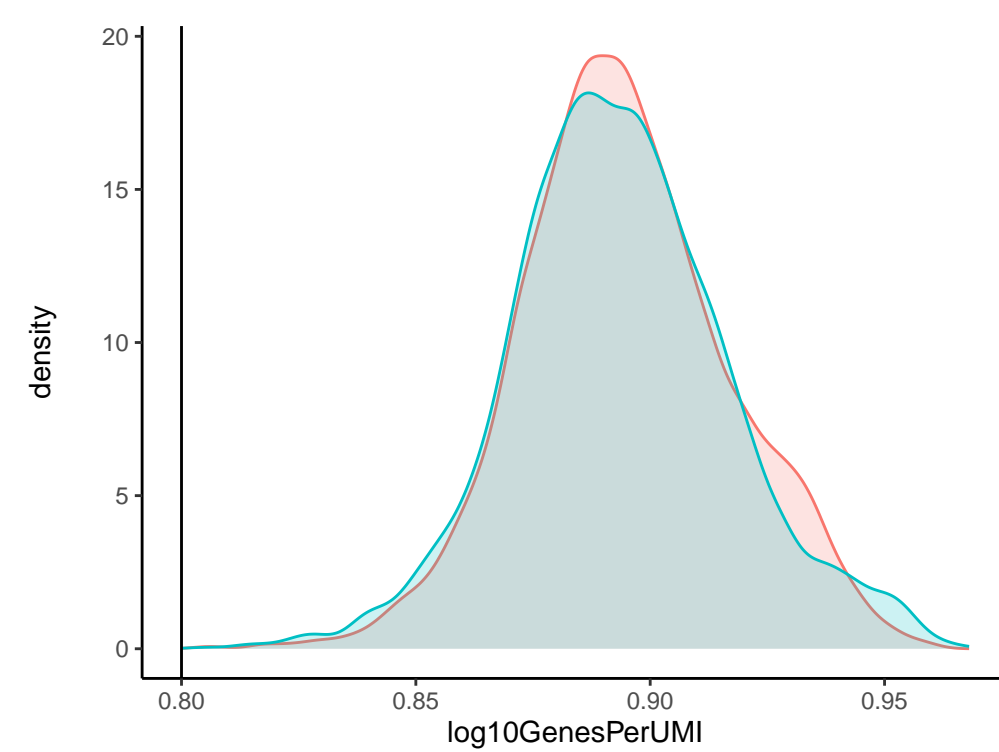

Supplement: Supplementary file 10 [file supplementary]

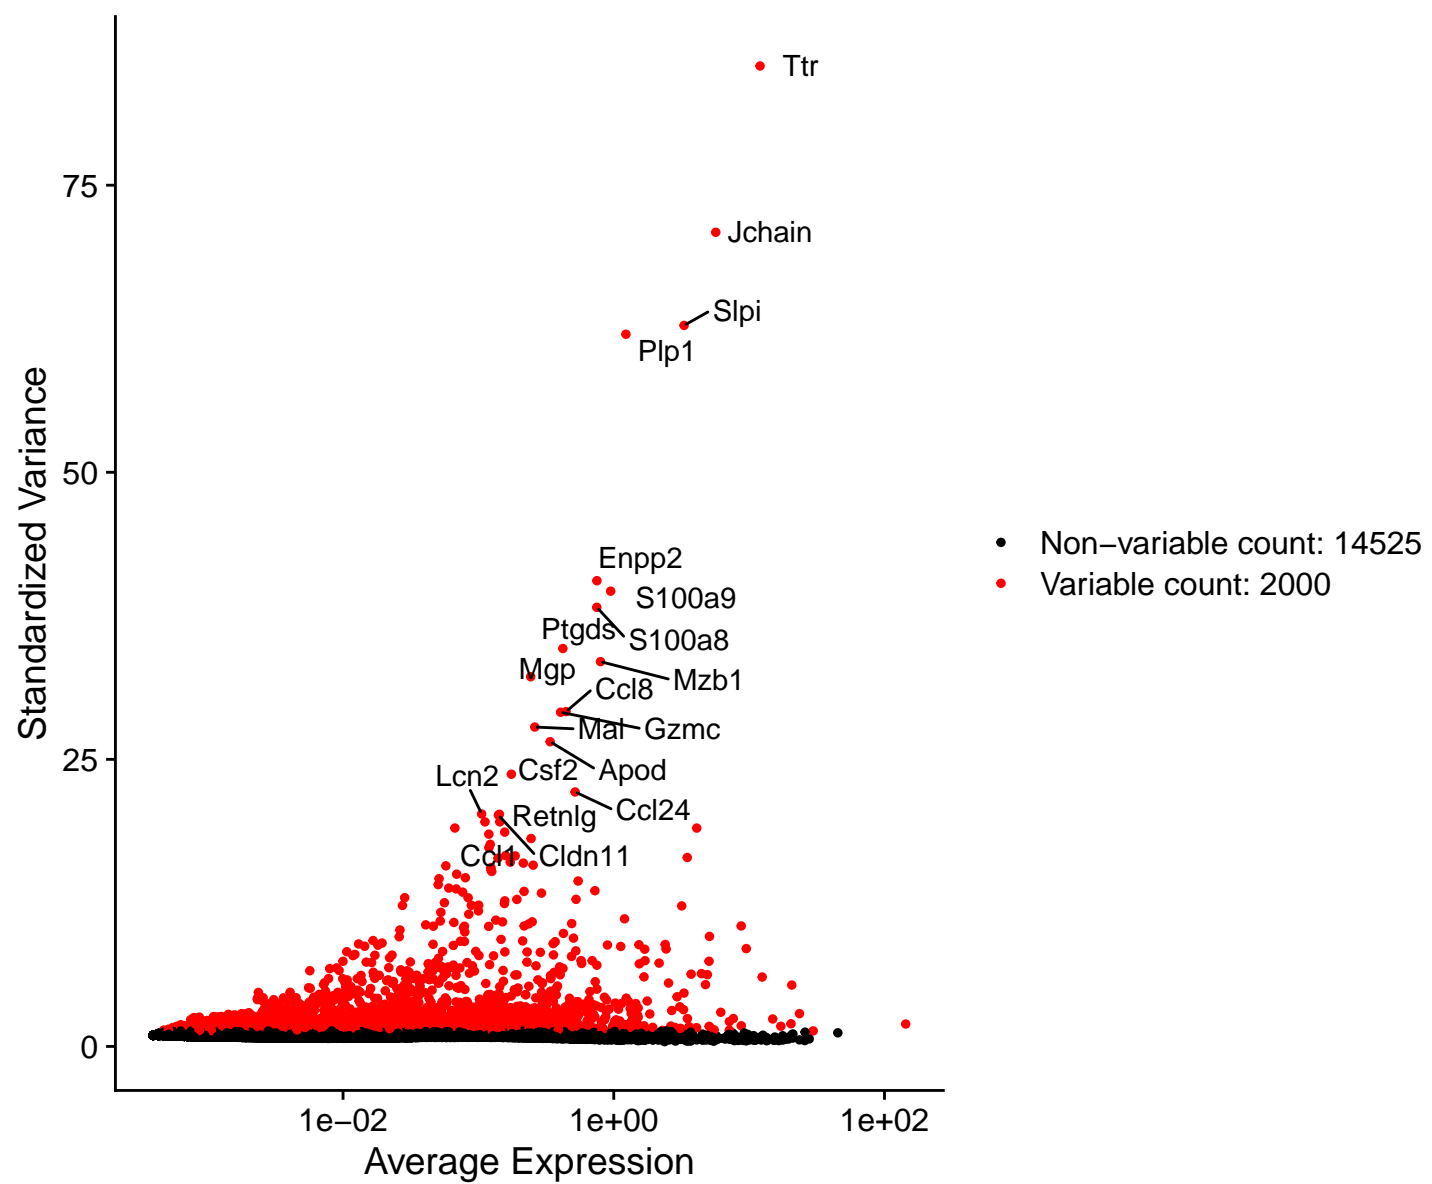

Supplement: Supplementary file 13 [file supplementary]

# Phase

G1

G2M

S

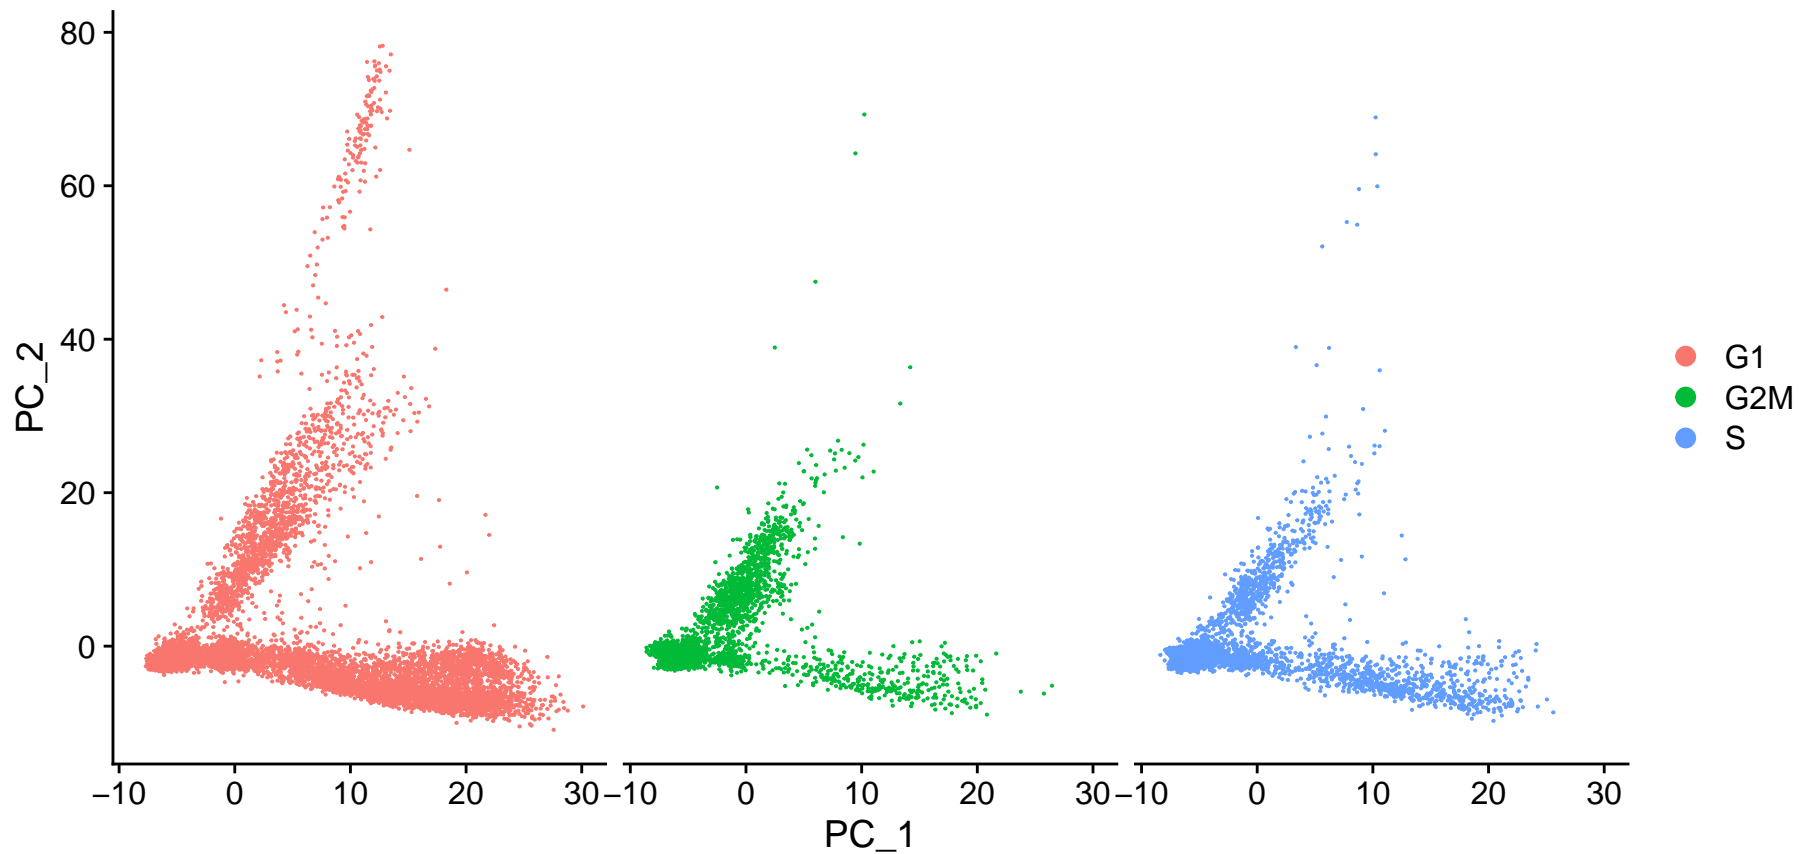

Supplement: Supplementary file 14 [file supplementary]
